# Supplementary material for: The Role of Water Content in the Casing Layer for Mushroom Crop Production and the Occurrence of Fungal Diseases
Source: MDPI journal article supplement (doi:10.3390/agronomy11102063), 2021-10-14
Supplement: s1 [file agronomy-1342576-supplementary.pdf › agronomy-1342576-supplementary.pdf]

## Supplementary Material

### The role of water content in the casing layer for mushroom crop production and the occurrence of fungal diseases

María J. Navarro<sup>1\*</sup>, Jaime Carrasco<sup>2, 3\*</sup>, Francisco J. Gea-Alegría<sup>1</sup>

<sup>1</sup> Centro de Investigación, Experimentación y Servicios del Champiñón (CIES), 16220 Quintanar del Rey, Cuenca, Spain.

<sup>2</sup> Centro Tecnológico de Investigación del Champiñón de La Rioja (CTICH), 26560 Autol, la Rioja, Spain.

<sup>3</sup> Department of Plant Sciences, University of Oxford, South Parks Road, Oxford OX1, UK.

\* Correspondence: MJN, mjnavarro.cies@dipucuenca.es; Tel.: (+34) 967496198; JC, jaime.carrasco@plants.ox.ac.uk; (+34) 941 390 960

**Table S1.** Physical, chemical, and biological characteristics of composts used in the trials.

| Parameters                | Trial A | Trial L-1 | Trial L-2 | Trial C-1 | Trial C-2 |
|---------------------------|---------|-----------|-----------|-----------|-----------|
| Moisture (%)              | 63.2    | 62.8      | 63.5      | 65.9      | 63.3      |
| pH (1:5, p/v)             | 6.57    | 6.64      | 6.52      | 6.26      | 6.49      |
| Nitrogen (% s.m.s.)       | 2.51    | 2.23      | 2.33      | 2.27      | 2.50      |
| Ash (% s.m.s.)            | 28.06   | 23.89     | 24.45     | 27.61     | 27.85     |
| Organic matter (% s.m.s.) | 71.94   | 76.11     | 75.55     | 72.39     | 72.15     |
| C/N                       | 16.6    | 19.8      | 18.8      | 18.5      | 16.7      |
| Mites                     | Absence | Absence   | Absence   | Absence   | Absence   |
| Nematodes                 | Absence | Absence   | Absence   | Absence   | Absence   |
| Competitor molds          | Absence | Absence   | Absence   | Absence   | Absence   |

**Table S2.** Physical, chemical, and biological characteristics of casing materials used in the trials.

| Parameters                                                    | Trial A | Trials L-1 and L-2 | Trial C-1 | Trial C-2 |
|---------------------------------------------------------------|---------|--------------------|-----------|-----------|
| pH (1:5, p/v)                                                 | 8.07    | 7.98               | 8.16      | 8.14      |
| Electrical conductivity (1:10, p/v) ( $\mu\text{S cm}^{-1}$ ) | 5,570   | 1,168              | 3,790     | 4,510     |
| Bulk density (fresh) ( $\text{g cm}^{-3}$ )                   | 0.601   | 0.614              | 0.548     | 0.575     |
| Bulk density (dry) ( $\text{g cm}^{-3}$ )                     | 0.111   | 0.133              | 0.119     | 0.120     |
| Particle real density ( $\text{g cm}^{-3}$ )                  | 1.904   | 2.024              | 1.920     | 1.934     |
| Total porespace (%)                                           | 94.2    | 93.4               | 93.8      | 93.8      |
| Water-holding capacity (%)                                    | 727     | 598                | 638       | 615       |
| Active lime (%)                                               | 11.79   | ---                | 11.15     | 11.89     |
| Total carbonates (%)                                          | 28.81   | ---                | 25.98     | 25.75     |
| Mites                                                         | Absence | Absence            | Absence   | Absence   |
| Nematodes                                                     | Absence | Absence            | Absence   | Absence   |
| Competitor molds                                              | Absence | Absence            | Absence   | Absence   |
